# Supplementary material
Source: publisher figshare collection journal article supplement (https://plos.figshare.com/articles/dataset/_/156786)

**S4. Details of the variable contributions to the calculated ENMs.** Figures S4.1 to S4.17 show the mean individual response curves (red) and their standard deviation (blue). Figure S4.18 details the estimated relative variable contribution without (percentage contribution) and with random permutation (permutation importance) of the values. Figure S4.19 and S4.20 show the results of the jackknifing tests of variable importance for the training (S4.19) and testing data (S4.20).

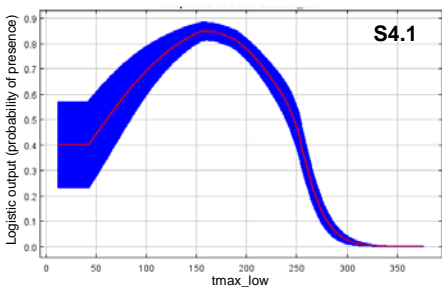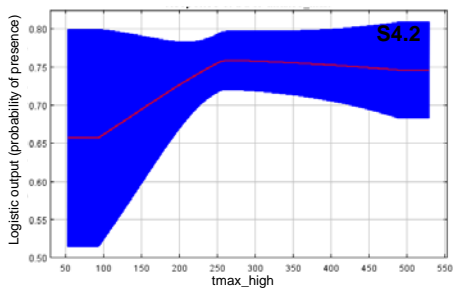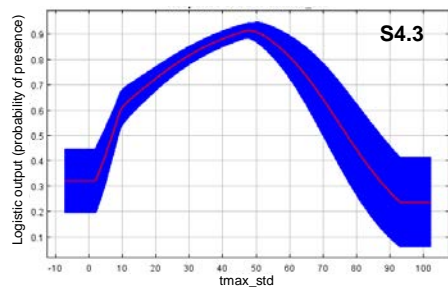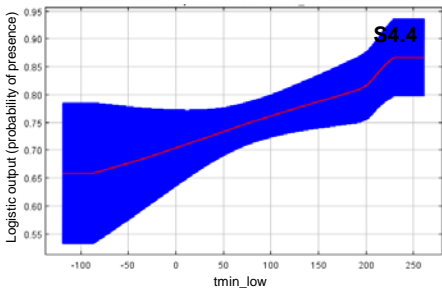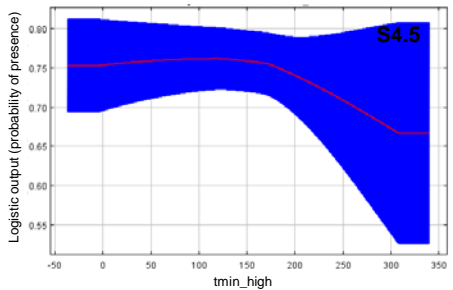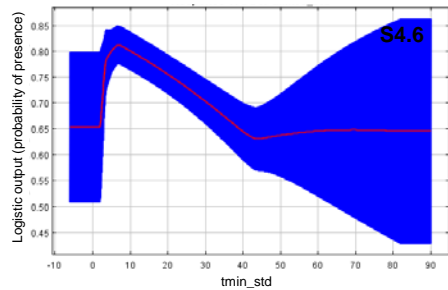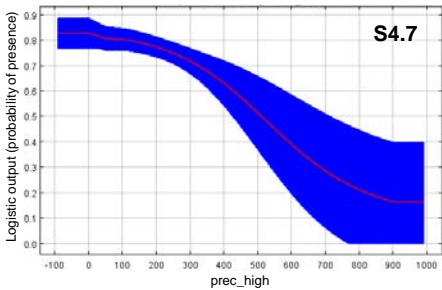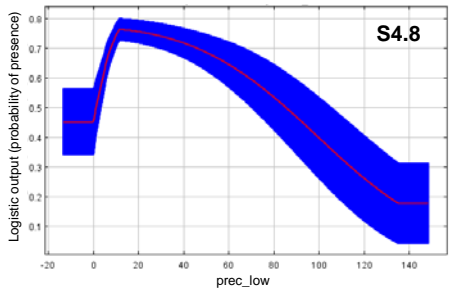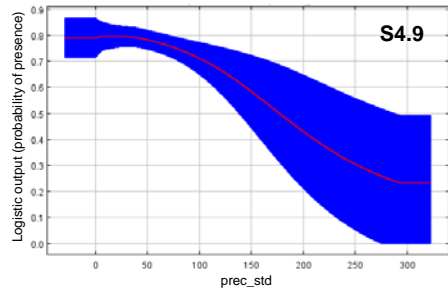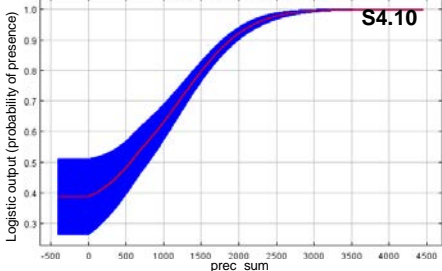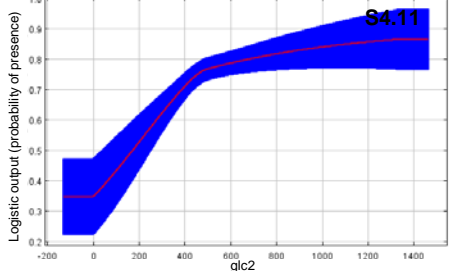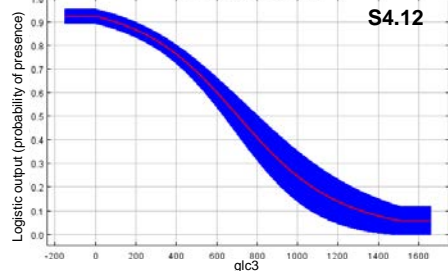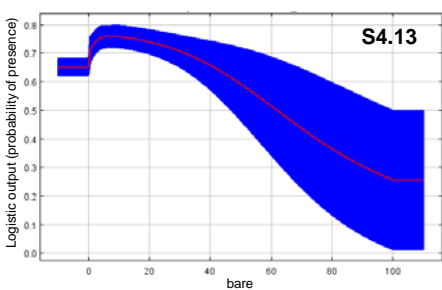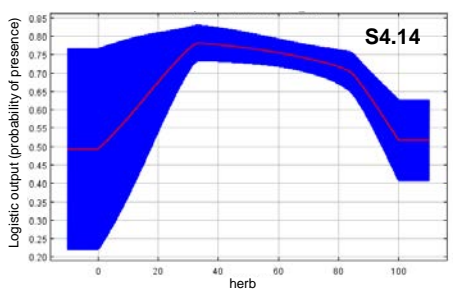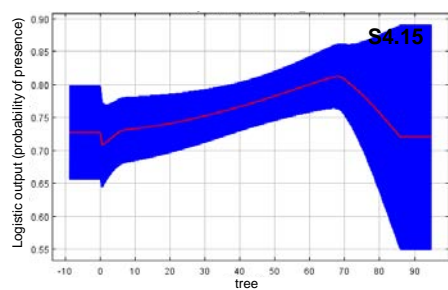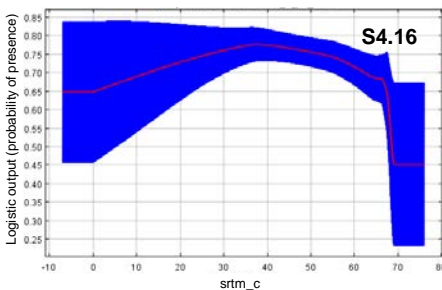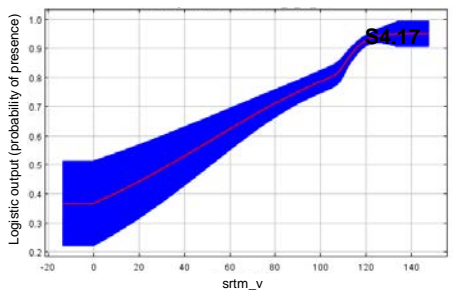

| S4.18 | Parameter | Percent contribution | Permutation importance |
|-------|-----------|----------------------|------------------------|
| 1     | tmax_low  | 17.5                 | 41.3                   |
| 2     | tmax_high | 1.1                  | 0.0                    |
| 3     | tmax_std  | 3.0                  | 4.6                    |
| 4     | tmin_low  | 0.2                  | 0.6                    |
| 5     | tmin_high | 0.9                  | 0.1                    |
| 6     | tmin_std  | 0.6                  | 1.3                    |
| 7     | prec_high | 0.1                  | 1.2                    |
| 8     | prec_low  | 35.3                 | 2.2                    |
| 9     | prec_std  | 0.2                  | 1.0                    |
| 10    | prec_sum  | 5.0                  | 12.3                   |
| 11    | glc2      | 0.5                  | 1.5                    |
| 12    | glc3      | 1.3                  | 11.8                   |
| 13    | bare      | 4.2                  | 13.4                   |
| 14    | herb      | 3.2                  | 3.9                    |
| 15    | tree      | 1.8                  | 1.0                    |
| 16    | srtm_c    | 2.4                  | 0.3                    |
| 17    | srtm_v    | 22.6                 | 3.4                    |

**S4.19**

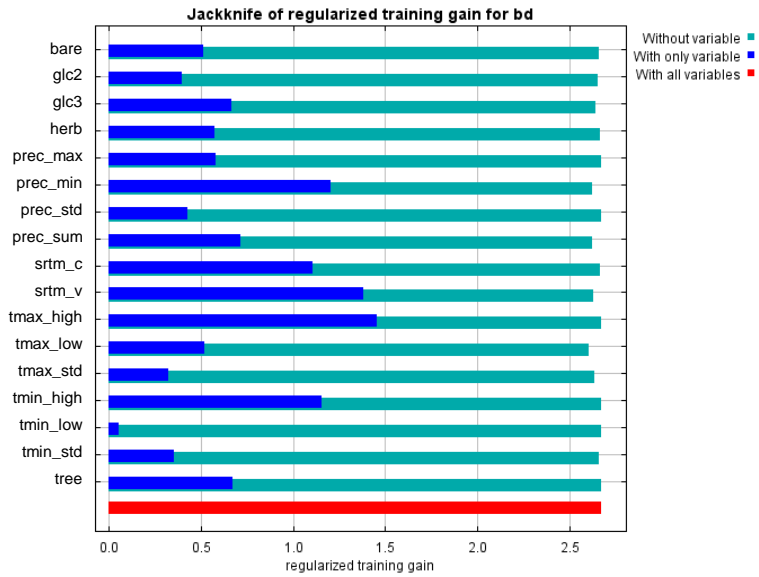

**S4.20**

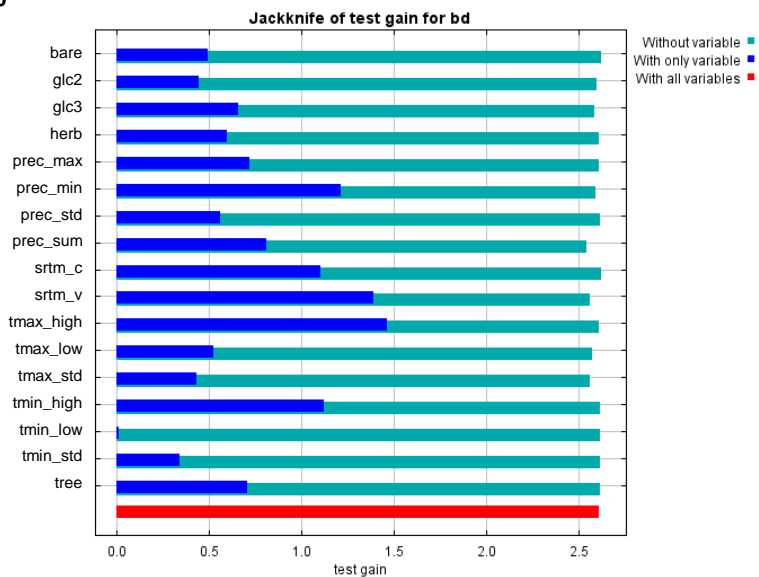

Supplement: Supplementary file [file 1]
