# Supplementary material
Source: publisher figshare collection journal article supplement (https://plos.figshare.com/articles/dataset/_/156786)
Supplement: Supplementary file [file 1]

**S1. List of West African caecilian and anuran species tested for the presence of *Bd*, and their main ecological characters.** All tests provided negative results. \* = taxa known to comprise complexes of cryptic species (Rödel *et al.* unpubl. data); § = comprises 52 samples from Guinea (*N. o. occidentalis*) and 10 samples from Liberia (*N. o. liberiensis*); # = unknown species sampled at the airport in Accra, Ghana; swab = molecular investigation of swab sample; toe/skin = histological examination of toe tip; lowland = most populations below 1,500 m asl; montane = most populations above 1,500 m asl; forest = predominantly undisturbed evergreen rainforest; farmbush = degraded forest, open areas in rainforest, dry forest; savannah = tree and open savannah, agricultural land; tadpoles = aquatic feeding larvae; direct dev = direct development without free larval stage, either in egg (*Arthroleptis* spp., *Phrynobatrachus tokba*) or female (*Nimbaphrynoides*); lentic = larval development in stagnant, usually temporary waters of varying sizes; lotic = larval development in flowing, usually permanent waters of varying sizes. Taxonomy based on most recent list of the “Amphibian species of the World” [1].

|                                   | sample |          | altitude |         | habitat |          |          | reproductive mode |            | breeding site |       |
|-----------------------------------|--------|----------|----------|---------|---------|----------|----------|-------------------|------------|---------------|-------|
|                                   | swab   | toe/skin | lowland  | montane | forest  | farmbush | savannah | tadpoles          | direct dev | lentic        | lotic |
| <b>Gymnophiona</b>                |        |          |          |         |         |          |          |                   |            |               |       |
| <b>Caecilidae</b>                 |        |          |          |         |         |          |          |                   |            |               |       |
| <i>Geotrypetes seraphini</i>      | 0      | 6        | 1        | 0       | 1       | 1        | 0        | 0                 | 1          | 0             | 0     |
| <b>Anura</b>                      |        |          |          |         |         |          |          |                   |            |               |       |
| <b>Arthroleptidae</b>             |        |          |          |         |         |          |          |                   |            |               |       |
| <i>Arthroleptis</i> spp. *        | 24     | 0        | 1        | 0       | 1       | 1        | 0        | 0                 | 1          | 0             | 0     |
| <i>Astylosternus occidentalis</i> | 3      | 0        | 1        | 0       | 1       | 1        | 0        | 1                 | 0          | 0             | 1     |
| <i>Cardioglossa occidentalis</i>  | 2      | 0        | 1        | 0       | 1       | 0        | 0        | 1                 | 0          | 0             | 1     |
| <i>Leptopelis spiritusnoctis</i>  | 5      | 0        | 1        | 0       | 1       | 1        | 0        | 1                 | 0          | 1             | 0     |
| <i>L. viridis</i>                 | 8      | 0        | 1        | 0       | 0       | 1        | 1        | 1                 | 0          | 1             | 0     |
| <b>Bufonidae</b>                  |        |          |          |         |         |          |          |                   |            |               |       |
| <i>Amietophrynus maculatus</i>    | 17     | 0        | 1        | 0       | 0       | 1        | 1        | 1                 | 0          | 1             | 0     |
| <i>A. regularis</i>               | 1      | 0        | 1        | 0       | 0       | 1        | 1        | 1                 | 0          | 1             | 0     |
| <i>A. togoensis</i>               | 3      | 0        | 1        | 0       | 1       | 0        | 0        | 1                 | 0          | 0             | 1     |

|                                       |     |    |   |   |   |   |   |   |   |   |   |
|---------------------------------------|-----|----|---|---|---|---|---|---|---|---|---|
| <i>“Bufo” pentoni</i>                 | 4   | 0  | 1 | 0 | 0 | 0 | 1 | 1 | 0 | 1 | 0 |
| <i>Nimbaphrynoides occidentalis</i> § | 62  | 0  | 0 | 1 | 0 | 0 | 1 | 0 | 1 | 0 | 0 |
| <b>Dicroglossidae</b>                 |     |    |   |   |   |   |   |   |   |   |   |
| <i>Hoplobatrachus occipitalis</i>     | 55  | 12 | 1 | 0 | 0 | 1 | 1 | 1 | 0 | 1 | 0 |
| <b>Hemisotidae</b>                    |     |    |   |   |   |   |   |   |   |   |   |
| <i>Hemius marmoratus</i>              | 5   | 0  | 1 | 0 | 1 | 1 | 1 | 1 | 0 | 1 | 0 |
| <b>Hyperoliidae</b>                   |     |    |   |   |   |   |   |   |   |   |   |
| <i>Afrixalus dorsalis</i>             | 3   | 0  | 1 | 0 | 0 | 1 | 1 | 1 | 0 | 1 | 0 |
| <i>Afrixalus nigeriensis</i>          | 1   | 0  | 1 | 0 | 1 | 1 | 0 | 1 | 0 | 1 | 0 |
| <i>Afrixalus vittiger</i>             | 5   | 0  | 1 | 0 | 0 | 0 | 1 | 1 | 0 | 1 | 0 |
| <i>A. weidholzi</i>                   | 1   | 0  | 1 | 0 | 0 | 0 | 1 | 1 | 0 | 1 | 0 |
| <i>Hyperolius bobirensis</i>          | 2   | 0  | 1 | 0 | 1 | 0 | 0 | 1 | 0 | 1 | 0 |
| <i>H. concolor</i>                    | 5   | 0  | 1 | 0 | 0 | 1 | 0 | 1 | 0 | 1 | 0 |
| <i>H. fusciventris</i>                | 1   | 0  | 1 | 0 | 1 | 1 | 0 | 1 | 0 | 1 | 0 |
| <i>H. guttulatus</i>                  | 2   | 0  | 1 | 0 | 0 | 1 | 0 | 1 | 0 | 1 | 0 |
| <i>H. nasutus</i> *                   | 1   | 0  | 1 | 0 | 0 | 0 | 1 | 1 | 0 | 1 | 0 |
| <i>H. nitidulus</i>                   | 6   | 0  | 1 | 0 | 0 | 0 | 1 | 1 | 0 | 1 | 0 |
| <i>H. picturatus</i>                  | 2   | 0  | 1 | 0 | 0 | 1 | 0 | 1 | 0 | 1 | 0 |
| <i>H. sylvaticus</i>                  | 2   | 0  | 1 | 0 | 1 | 0 | 0 | 1 | 0 | 1 | 0 |
| <i>H. sp. #</i>                       | 9   | 0  | 1 | 0 | ? | ? | ? | 1 | 0 | 1 | 0 |
| <i>Kassina arboricola</i>             | 2   | 0  | 1 | 0 | 1 | 1 | 0 | 1 | 0 | 1 | 0 |
| <i>K. cassinoides</i>                 | 2   | 0  | 1 | 0 | 0 | 0 | 1 | 1 | 0 | 1 | 0 |
| <i>K. schioetzi</i>                   | 3   | 0  | 1 | 0 | 0 | 1 | 1 | 0 | 0 | 1 | 0 |
| <i>K. senegalensis</i>                | 12  | 0  | 1 | 0 | 0 | 0 | 1 | 1 | 0 | 1 | 0 |
| <i>Phlyctimantis boulengeri</i>       | 2   | 0  | 1 | 0 | 1 | 1 | 0 | 1 | 0 | 1 | 0 |
| <b>Microhylidae</b>                   |     |    |   |   |   |   |   |   |   |   |   |
| <i>Phrynomantis microps</i>           | 33  | 0  | 1 | 0 | 0 | 0 | 1 | 1 | 0 | 1 | 0 |
| <b>Petropedetidae</b>                 |     |    |   |   |   |   |   |   |   |   |   |
| <i>Conraua alleni</i> *               | 52  | 34 | 1 | 1 | 1 | 0 | 0 | 1 | 0 | 0 | 1 |
| <i>C. derooi</i>                      | 5   | 7  | 1 | 0 | 1 | 0 | 0 | 1 | 0 | 0 | 1 |
| <i>Petropedetes natator</i> *         | 138 | 20 | 1 | 1 | 1 | 0 | 0 | 1 | 0 | 0 | 1 |
| <b>Phrynobatrachidae</b>              |     |    |   |   |   |   |   |   |   |   |   |
| <i>Phrynobatrachus alleni</i>         | 10  | 0  | 1 | 0 | 1 | 0 | 0 | 1 | 0 | 1 | 1 |

|                                  |    |    |   |   |   |   |   |   |   |   |   |
|----------------------------------|----|----|---|---|---|---|---|---|---|---|---|
| <i>P. annulatus</i>              | 9  | 0  | 1 | 0 | 1 | 0 | 0 | ? | ? | ? | ? |
| <i>P. calcaratus</i> *           | 10 | 0  | 1 | 0 | 1 | 1 | 0 | 1 | 0 | 1 | 1 |
| <i>P. francisci</i>              | 2  | 0  | 1 | 0 | 0 | 0 | 1 | 1 | 0 | 1 | 0 |
| <i>P. latifrons</i>              | 43 | 36 | 1 | 0 | 0 | 1 | 1 | 1 | 0 | 1 | 0 |
| <i>P. liberiensis</i>            | 19 | 0  | 1 | 0 | 1 | 0 | 0 | 1 | 0 | 0 | 1 |
| <i>P. natalensis</i>             | 4  | 0  | 1 | 0 | 0 | 1 | 1 | 1 | 0 | 1 | 0 |
| <i>P. plicatus</i>               | 19 | 0  | 1 | 0 | 1 | 0 | 0 | 1 | 0 | 1 | 0 |
| <i>P. tokba</i>                  | 2  | 0  | 1 | 1 | 1 | 1 | 0 | 0 | 1 | 0 | 0 |
| <i>P. sp.</i>                    | 1  | 0  | 1 | 0 | ? | ? | ? | ? | ? | ? | ? |
| <b>Pipidae</b>                   |    |    |   |   |   |   |   |   |   |   |   |
| <i>Pseudhymenochirus merlini</i> | 0  | 1  | 1 | 0 | 1 | 1 | 0 | 1 | 0 | 1 | 0 |
| <i>Silurana tropicalis</i>       | 6  | 9  | 1 | 0 | 1 | 1 | 0 | 1 | 0 | 1 | 0 |
| <i>Xenopus muelleri</i>          | 2  | 5  | 1 | 0 | 0 | 0 | 1 | 1 | 0 | 1 | 0 |
| <b>Ptychadenidae</b>             |    |    |   |   |   |   |   |   |   |   |   |
| <i>Ptychadena aequiplicata</i> * | 5  | 0  | 1 | 0 | 1 | 0 | 0 | 1 | 0 | 1 | 0 |
| <i>P. bibroni</i>                | 1  | 0  | 1 | 0 | 0 | 1 | 1 | 1 | 0 | 1 | 0 |
| <i>P. longirostris</i>           | 5  | 0  | 1 | 0 | 1 | 0 | 0 | 1 | 0 | 1 | 0 |
| <i>P. mascareniensis</i> *       | 1  | 0  | 1 | 0 | 0 | 1 | 1 | 1 | 0 | 0 | 1 |
| <i>P. oxyrhynchus</i>            | 1  | 0  | 1 | 0 | 0 | 1 | 1 | 1 | 0 | 1 | 0 |
| <i>P. pumilio</i>                | 5  | 0  | 1 | 0 | 0 | 0 | 1 | 1 | 0 | 1 | 0 |
| <i>P. tellini</i>                | 4  | 0  | 1 | 0 | 0 | 0 | 1 | 1 | 0 | 1 | 0 |
| <i>P. tournieri</i>              | 2  | 0  | 1 | 0 | 0 | 0 | 1 | 1 | 0 | 1 | 0 |
| <b>Pyxicephalidae</b>            |    |    |   |   |   |   |   |   |   |   |   |
| <i>Pyxicephalus edulis</i>       | 5  | 0  | 1 | 0 | 0 | 0 | 1 | 1 | 0 | 1 | 0 |
| <i>Aubria subsigillata</i>       | 2  | 7  | 1 | 0 | 1 | 0 | 0 | 1 | 0 | 1 | 1 |
| <b>Ranidae</b>                   |    |    |   |   |   |   |   |   |   |   |   |
| <i>Hylarana albolabris</i>       | 11 | 0  | 1 | 0 | 1 | 0 | 0 | 1 | 0 | 0 | 1 |
| <i>H. galamensis</i>             | 6  | 0  | 1 | 0 | 0 | 0 | 0 | 1 | 0 | 1 | 0 |
| <i>H. occidentalis</i>           | 2  | 0  | 1 | 0 | 1 | 0 | 0 | 1 | 0 | ? | ? |
| <b>Rhacophoridae</b>             |    |    |   |   |   |   |   |   |   |   |   |
| <i>Chiromantis rufescens</i>     | 1  | 0  | 1 | 0 | 1 | 0 | 0 | 1 | 0 | 1 | 0 |

## References

1. Frost DR (2011) Amphibian Species of the World: an Online Reference. Version 5.5. <http://research.amnh.org/vz/herpetology/amphibia/> Accessed 28 February 2012.
