# Supplementary material
Source: publisher figshare collection journal article supplement (https://plos.figshare.com/articles/dataset/_/156786)
Supplement: Supplementary file [file 1]

**S3. List of positive African *Bd* records.** The list shows localities which were accurate on the 30 arc sec grid. Out of the first 177 points 112 points were used for the ENMs (the remaining 65 fell on the same grid cell as another positive record). Record numbers 178 to 180 show the old records which are depicted in the figures but not used for the ENMs. The following abbreviation was used: NP = National Park. Taxonomy adjusted to most recent list of the “Amphibian species of the World” [1] with original names in brackets.

| No. | Country | Site                         | Lat  | Lon   | Genus                      | Species               | Reference |
|-----|---------|------------------------------|------|-------|----------------------------|-----------------------|-----------|
| 1   | Gabon   | Monts de Cristal & Ivindo NP | 0.51 | 12.80 | <i>Afrixalus</i>           | <i>paradorsalis</i>   | [2]       |
| 2   | Gabon   | Monts de Cristal & Ivindo NP | 0.63 | 10.40 | <i>Hylarana (Amnirana)</i> | sp.                   | [2]       |
| 3   | Gabon   | Monts de Cristal & Ivindo NP | 0.51 | 12.80 | <i>Hylarana (Amnirana)</i> | sp.                   | [2]       |
| 4   | Gabon   | Monts de Cristal & Ivindo NP | 0.52 | 12.79 | <i>Hylarana (Amnirana)</i> | sp.                   | [2]       |
| 5   | Gabon   | Monts de Cristal & Ivindo NP | 0.50 | 12.80 | <i>Hylarana (Amnirana)</i> | sp.                   | [2]       |
| 6   | Gabon   | Monts de Cristal & Ivindo NP | 0.51 | 12.80 | <i>Arthroleptis</i>        | sp.                   | [2]       |
| 7   | Gabon   | Monts de Cristal & Ivindo NP | 0.45 | 10.28 | <i>Arthroleptis</i>        | sp.                   | [2]       |
| 8   | Gabon   | Monts de Cristal & Ivindo NP | 0.45 | 10.28 | <i>Cardioglossa</i>        | <i>elegans</i>        | [2]       |
| 9   | Gabon   | Monts de Cristal & Ivindo NP | 0.45 | 10.28 | <i>Chiromantis</i>         | <i>rufescens</i>      | [2]       |
| 10  | Gabon   | Monts de Cristal & Ivindo NP | 0.51 | 12.80 | <i>Chiromantis</i>         | <i>rufescens</i>      | [2]       |
| 11  | Gabon   | Monts de Cristal & Ivindo NP | 0.51 | 12.80 | <i>Chiromantis</i>         | <i>rufescens</i>      | [2]       |
| 12  | Gabon   | Monts de Cristal & Ivindo NP | 0.50 | 12.79 | <i>Conraua</i>             | <i>crassipes</i>      | [2]       |
| 13  | Gabon   | Monts de Cristal & Ivindo NP | 0.45 | 10.28 | <i>Hyperolius</i>          | <i>ocellatus</i>      | [2]       |
| 14  | Gabon   | Monts de Cristal & Ivindo NP | 0.52 | 12.79 | <i>Hyperolius</i>          | <i>ocellatus</i>      | [2]       |
| 15  | Gabon   | Monts de Cristal & Ivindo NP | 0.50 | 12.79 | <i>Hyperolius</i>          | <i>ocellatus</i>      | [2]       |
| 16  | Gabon   | Monts de Cristal & Ivindo NP | 0.50 | 12.80 | <i>Hyperolius</i>          | <i>ocellatus</i>      | [2]       |
| 17  | Gabon   | Monts de Cristal & Ivindo NP | 0.62 | 10.41 | <i>Hyperolius</i>          | <i>tuberculatus</i>   | [2]       |
| 18  | Gabon   | Monts de Cristal & Ivindo NP | 0.50 | 12.79 | <i>Leptopelis</i>          | <i>aubryi</i>         | [2]       |
| 19  | Gabon   | Monts de Cristal & Ivindo NP | 0.50 | 12.79 | <i>Leptopelis</i>          | <i>aubryi</i>         | [2]       |
| 20  | Gabon   | Monts de Cristal & Ivindo NP | 0.50 | 12.80 | <i>Leptopelis</i>          | <i>aubryi</i>         | [2]       |
| 21  | Gabon   | Monts de Cristal & Ivindo NP | 0.51 | 12.80 | <i>Leptopelis</i>          | <i>brevirostris</i>   | [2]       |
| 22  | Gabon   | Monts de Cristal & Ivindo NP | 0.63 | 10.40 | <i>Leptopelis</i>          | <i>crystallinoron</i> | [2]       |
| 23  | Gabon   | Monts de Cristal & Ivindo NP | 0.45 | 10.28 | <i>Leptopelis</i>          | <i>crystallinoron</i> | [2]       |
| 24  | Gabon   | Monts de Cristal & Ivindo NP | 0.51 | 12.80 | <i>Leptopelis</i>          | <i>millsoni</i>       | [2]       |
| 25  | Gabon   | Monts de Cristal & Ivindo NP | 0.62 | 10.40 | <i>Leptopelis</i>          | sp.                   | [2]       |

|    |          |                              |        |       |                        |                          |     |
|----|----------|------------------------------|--------|-------|------------------------|--------------------------|-----|
| 26 | Gabon    | Monts de Cristal & Ivindo NP | 0.51   | 12.80 | <i>Leptopelis</i>      | sp.                      | [2] |
| 27 | Gabon    | Monts de Cristal & Ivindo NP | 0.50   | 12.80 | <i>Leptopelis</i>      | sp.                      | [2] |
| 28 | Gabon    | Monts de Cristal & Ivindo NP | 0.63   | 10.40 | <i>Petropedetes</i>    | <i>vulpiae (newtoni)</i> | [2] |
| 29 | Gabon    | Monts de Cristal & Ivindo NP | 0.45   | 10.28 | <i>Petropedetes</i>    | <i>palmipes</i>          | [2] |
| 30 | Gabon    | Monts de Cristal & Ivindo NP | 0.45   | 10.28 | <i>Petropedetes</i>    | <i>palmipes</i>          | [2] |
| 31 | Gabon    | Monts de Cristal & Ivindo NP | 0.45   | 10.28 | <i>Phrynobatrachus</i> | <i>auritus</i>           | [2] |
| 32 | Gabon    | Monts de Cristal & Ivindo NP | 0.63   | 10.40 | <i>Phrynobatrachus</i> | <i>auritus</i>           | [2] |
| 33 | Gabon    | Monts de Cristal & Ivindo NP | 0.63   | 10.40 | <i>Phrynobatrachus</i> | <i>auritus</i>           | [2] |
| 34 | Gabon    | Monts de Cristal & Ivindo NP | 0.45   | 10.28 | <i>Ptychadena</i>      | sp.                      | [2] |
| 35 | Gabon    | Monts de Cristal & Ivindo NP | 0.50   | 12.79 | <i>Ptychadena</i>      | sp.                      | [2] |
| 36 | Gabon    | Monts de Cristal & Ivindo NP | 0.45   | 10.28 | <i>Scotobleps</i>      | <i>gabonicus</i>         | [2] |
| 37 | Gabon    | Monts de Cristal & Ivindo NP | 0.63   | 10.40 | <i>Scotobleps</i>      | <i>gabonicus</i>         | [2] |
| 38 | Gabon    | Monts de Cristal & Ivindo NP | 0.62   | 10.41 | <i>Scotobleps</i>      | <i>gabonicus</i>         | [2] |
| 39 | Gabon    | Monts de Cristal & Ivindo NP | 0.51   | 12.80 | <i>Afrixalus</i>       | <i>fulvovittatus</i>     | [2] |
| 40 | Kenya    | Langata, Nairobi             | -1.40  | 36.77 | <i>Ptychadena</i>      | <i>anchietae</i>         | [3] |
| 41 | Malawi   | Mulanje                      | -16.02 | 35.50 | <i>Afrixalus</i>       | <i>aureus crotalus</i>   | [4] |
| 42 | Malawi   | Mulanje                      | -16.02 | 35.52 | <i>Amietia</i>         | <i>angolensis</i>        | [4] |
| 43 | Malawi   | Mulanje                      | -15.90 | 35.67 | <i>Amietia</i>         | <i>angolensis</i>        | [4] |
| 44 | Malawi   | Mulanje                      | -15.96 | 35.69 | <i>Amietia</i>         | <i>angolensis</i>        | [4] |
| 45 | Malawi   | Mulanje                      | -15.96 | 35.69 | <i>Amietia</i>         | <i>angolensis</i>        | [4] |
| 46 | Malawi   | Mulanje                      | -15.96 | 35.69 | <i>Amietia</i>         | <i>johnstoni</i>         | [4] |
| 47 | Malawi   | Mulanje                      | -15.96 | 35.69 | <i>Amietia</i>         | <i>johnstoni</i>         | [4] |
| 48 | Malawi   | Mulanje                      | -15.82 | 35.72 | <i>Arthroleptis</i>    | <i>xenodactyloides</i>   | [4] |
| 49 | Malawi   | Mulanje                      | -15.82 | 35.72 | <i>Arthroleptis</i>    | <i>xenodactyloides</i>   | [4] |
| 50 | Malawi   | Mulanje                      | -15.89 | 35.62 | <i>Nothophryne</i>     | <i>broadleyi</i>         | [4] |
| 51 | Malawi   | Mulanje                      | -16.02 | 35.52 | <i>Phrynobatrachus</i> | <i>natalensis</i>        | [4] |
| 52 | Malawi   | Mulanje                      | -15.82 | 35.72 | <i>Phrynobatrachus</i> | <i>natalensis</i>        | [4] |
| 53 | Malawi   | Mulanje                      | -15.93 | 35.68 | <i>Strongylopus</i>    | <i>fuelleborni</i>       | [4] |
| 54 | Malawi   | Mulanje                      | -16.02 | 35.50 | <i>Xenopus</i>         | <i>muelleri</i>          | [4] |
| 55 | Morocco  | Agnane, Near Tetouan         | 35.54  | -5.39 | <i>Discoglossus</i>    | <i>scovazzi</i>          | [5] |
| 56 | Morocco  | 20km from Larache-Lakslakbir | 35.04  | -6.05 | <i>Discoglossus</i>    | <i>scovazzi</i>          | [5] |
| 57 | Morocco  | 20km from Larache-Lakslakbir | 35.04  | -6.05 | <i>Hyla</i>            | <i>meridionalis</i>      | [5] |
| 58 | Morocco  | Larache                      | 35.04  | -6.03 | <i>Pelobates</i>       | <i>varavaldii</i>        | [5] |
| 59 | DR Congo | Kahuzi Biega NP              | -2.31  | 28.76 | <i>Hyperolius</i>      | <i>kivuensis</i>         | [6] |

|    |              |                             |        |       |                               |                     |     |
|----|--------------|-----------------------------|--------|-------|-------------------------------|---------------------|-----|
| 60 | DR Congo     | Kahuzi Biega NP             | -1.89  | 28.45 | <i>Hyperolius</i>             | <i>kuligae</i>      | [6] |
| 61 | South Africa | Algeria, Cederberg          | -32.37 | 19.06 | <i>Amietia (Afrana)</i>       | <i>fuscigula</i>    | [7] |
| 62 | South Africa | Bloukikerboom-water, Geogap | -29.63 | 18.01 | <i>Amietia (Afrana)</i>       | <i>fuscigula</i>    | [7] |
| 63 | South Africa | Grobbelaars River           | -33.42 | 22.24 | <i>Amietia (Afrana)</i>       | <i>fuscigula</i>    | [7] |
| 64 | South Africa | Groot Winterhoek            | -33.00 | 19.06 | <i>Amietia (Afrana)</i>       | <i>fuscigula</i>    | [7] |
| 65 | South Africa | Jamaka farm pond. Cederberg | -32.34 | 19.02 | <i>Amietia (Afrana)</i>       | <i>fuscigula</i>    | [7] |
| 66 | South Africa | Kraaifontein, Geogap        | -29.63 | 18.03 | <i>Amietia (Afrana)</i>       | <i>fuscigula</i>    | [7] |
| 67 | South Africa | Stellenbosch                | -33.93 | 18.87 | <i>Amietia (Afrana)</i>       | <i>fuscigula</i>    | [7] |
| 68 | South Africa | Swellendam                  | -34.01 | 20.46 | <i>Amietia (Afrana)</i>       | <i>fuscigula</i>    | [7] |
| 69 | South Africa | Table Mountain              | -33.95 | 18.43 | <i>Amietia (Afrana)</i>       | <i>fuscigula</i>    | [7] |
| 70 | South Africa | Table Mountain              | -33.95 | 18.43 | <i>Amietia (Afrana)</i>       | <i>fuscigula</i>    | [7] |
| 71 | South Africa | Tradouws pass               | -33.97 | 20.70 | <i>Amietia (Afrana)</i>       | <i>fuscigula</i>    | [7] |
| 72 | South Africa | Jamaka farm pond. Cederberg | -32.34 | 19.02 | <i>Strongylopus</i>           | <i>grayii</i>       | [7] |
| 73 | Lesotho      | Katsi Dam                   | -29.34 | 28.51 | <i>Amietia (Afrana)</i>       | <i>dracomontana</i> | [8] |
| 74 | South Africa | Kammieskroon, Northern Cape | -30.2  | 17.93 | <i>Amietia (Afrana)</i>       | <i>fuscigula</i>    | [8] |
| 75 | South Africa | Springbok, Northern Cape    | -26.85 | 21.78 | <i>Amietia (Afrana)</i>       | <i>fuscigula</i>    | [8] |
| 76 | Lesotho      | Katsi Dam                   | -29.34 | 28.51 | <i>Amietia</i>                | <i>vertebralis</i>  | [8] |
| 77 | South Africa | Springbok, Northern Cape    | -26.85 | 21.78 | <i>Vandijkophrynus (Bufo)</i> | <i>robinsoni</i>    | [8] |
| 78 | South Africa | Kenton on Sea               | -33.70 | 26.68 | <i>Cacosternum</i>            | <i>boettgeri</i>    | [8] |
| 79 | South Africa | Oudtshoorn                  | -33.58 | 22.20 | <i>Heleophryne</i>            | <i>regis</i>        | [8] |
| 80 | South Africa | Kenton on Sea               | -33.70 | 26.68 | <i>Kassina</i>                | <i>senegalensis</i> | [8] |
| 81 | South Africa | Kenton on Sea               | -33.70 | 26.68 | <i>Strongylopus</i>           | <i>fasciatus</i>    | [8] |
| 82 | South Africa | Zeekoevlei, Western Cape    | -34.07 | 18.52 | <i>Xenopus</i>                | <i>gilli</i>        | [8] |
| 83 | Botswana     | Kanye Youth Centre          | -24.98 | 25.35 | <i>Xenopus</i>                | <i>laevis</i>       | [8] |
| 84 | South Africa | Florisbad, Free State       | -28.77 | 26.08 | <i>Xenopus</i>                | <i>laevis</i>       | [8] |
| 85 | South Africa | Harrismith, Free State      | -28.28 | 29.13 | <i>Xenopus</i>                | <i>laevis</i>       | [8] |
| 86 | South Africa | Klapmuts                    | -33.81 | 18.86 | <i>Xenopus</i>                | <i>laevis</i>       | [8] |
| 87 | South Africa | Koffiefontein               | -29.40 | 25.02 | <i>Xenopus</i>                | <i>laevis</i>       | [8] |
| 88 | South Africa | Kwa-Zulu, Natal             | -30.98 | 29.23 | <i>Xenopus</i>                | <i>laevis</i>       | [8] |
| 89 | South Africa | Sannaspos                   | -29.15 | 26.53 | <i>Xenopus</i>                | <i>laevis</i>       | [8] |
| 90 | South Africa | Strand                      | -34.12 | 18.83 | <i>Xenopus</i>                | <i>laevis</i>       | [8] |
| 91 | South Africa | Zeekoevlei, Western Cape    | -34.07 | 18.52 | <i>Xenopus</i>                | <i>laevis</i>       | [8] |
| 92 | Zambia       | Lusaka                      | -15.02 | 28.23 | <i>Xenopus</i>                | <i>laevis</i>       | [8] |
| 93 | Zambia       | Lusaka                      | -15.02 | 28.23 | <i>Xenopus</i>                | <i>laevis</i>       | [8] |

|     |              |                                |        |       |                         |                   |      |
|-----|--------------|--------------------------------|--------|-------|-------------------------|-------------------|------|
| 94  | Nigeria      | Okomu National Park            | 6.30   | 5.25  | <i>Chiromatis</i>       | <i>rufescens</i>  | [9]  |
| 95  | Kenya        | Mt. Elgon NP                   | 1.03   | 34.77 | NA                      | NA                | [10] |
| 96  | Kenya        | Saiwa Swamp NP                 | 1.11   | 35.12 | NA                      | NA                | [10] |
| 97  | Kenya        | Shimba Hills NP                | -4.18  | 39.42 | NA                      | NA                | [10] |
| 98  | Kenya        | Taita Hills (Mwatate)          | -3.51  | 38.38 | NA                      | NA                | [10] |
| 99  | Kenya        | Taita Hills (Mwundanyi)        | -3.41  | 38.36 | NA                      | NA                | [10] |
| 100 | Kenya        | Aberdares NP (moorlands)       | -0.41  | 36.72 | NA                      | NA                | [10] |
| 101 | Kenya        | Aberdares NP (Salient)         | -0.37  | 36.84 | NA                      | NA                | [10] |
| 102 | Kenya        | Kakamega Forest NP             | 0.35   | 34.87 | NA                      | NA                | [10] |
| 103 | Kenya        | Nairobi (Karens)               | -1.33  | 36.80 | NA                      | NA                | [10] |
| 104 | Kenya        | Thompson Falls                 | 0.04   | 36.37 | NA                      | NA                | [10] |
| 105 | Kenya        | Tigoni Dam                     | -1.14  | 36.68 | NA                      | NA                | [10] |
| 106 | South Africa | Stutterheim, Kologha Forest    | -32.54 | 27.37 | <i>Amietia (Afrana)</i> | <i>fuscigula</i>  | [11] |
| 107 | South Africa | Grabouw                        | -34.15 | 19.02 | <i>Xenopus</i>          | <i>laevis</i>     | [12] |
| 108 | South Africa | Bredasor/Bredasdorp?           | -34.53 | 20.03 | <i>Xenopus</i>          | <i>laevis</i>     | [12] |
| 109 | South Africa | Hex River                      | -33.48 | 19.58 | <i>Xenopus</i>          | <i>laevis</i>     | [12] |
| 110 | South Africa | Knysna                         | -34.03 | 23.03 | <i>Xenopus</i>          | <i>laevis</i>     | [12] |
| 111 | Nigeria      | Kwano Camp (Gashaka Gumti NP)  | 7.33   | 11.59 | <i>Amietophrynus</i>    | sp.               | [13] |
| 112 | Nigeria      | Kwano Camp (Gashaka Gumti NP)  | 7.33   | 11.59 | <i>Astylosternus</i>    | sp.               | [13] |
| 113 | Nigeria      | Kwano Camp (Gashaka Gumti NP)  | 7.33   | 11.59 | <i>Petropedetes</i>     | sp.               | [13] |
| 114 | Tanzania     | Kihansi falls                  | -8.59  | 35.85 | <i>Nectophrynoides</i>  | <i>asperginis</i> | [14] |
| 115 | South Africa | Bela-Bela, Limpopo Province    | -24.88 | 28.29 | <i>Amietia (Afrana)</i> | <i>angolensis</i> | [15] |
| 116 | South Africa | Port Elizabeth, Eastern Cape   | -33.97 | 25.58 | <i>Amietia (Afrana)</i> | <i>fuscigula</i>  | [15] |
| 117 | South Africa | Bela-Bela, Limpopo Province    | -24.88 | 28.29 | <i>Tomopterna</i>       | <i>cryptotis</i>  | [15] |
| 118 | South Africa | Bela-Bela, Limpopo Province    | -24.88 | 28.29 | <i>Tomopterna</i>       | <i>natalensis</i> | [15] |
| 119 | South Africa | Botrivier, Western Cape        | -34.23 | 19.20 | <i>Xenopus</i>          | <i>laevis</i>     | [15] |
| 120 | South Africa | Wellington, Western Cape       | -33.63 | 19.00 | <i>Xenopus</i>          | <i>laevis</i>     | [15] |
| 121 | South Africa | Kommissiepoort, Free State     | -29.32 | 27.28 | <i>Xenopus</i>          | <i>laevis</i>     | [16] |
| 122 | South Africa | Moi River, KwaZulu-Natal       | -29.20 | 29.98 | <i>Xenopus</i>          | <i>laevis</i>     | [16] |
| 123 | South Africa | Phillipi, Western Cape         | -34.02 | 18.55 | <i>Xenopus</i>          | <i>laevis</i>     | [16] |
| 124 | South Africa | Rosendal, Free State           | -28.52 | 27.93 | <i>Xenopus</i>          | <i>laevis</i>     | [16] |
| 125 | South Africa | Windsorton Road, Northern Cape | -28.35 | 24.82 | <i>Xenopus</i>          | <i>laevis</i>     | [16] |
| 126 | Cameroon     | Ngoum-Bandi (PK27)             | 2.14   | 15.66 | <i>Phlyctimantis</i>    | <i>boulengeri</i> | [17] |
| 127 | Cameroon     | Mt Oku                         | 6.22   | 10.39 | NA                      | NA                | [18] |

|     |          |                    |      |       |                        |                      |      |
|-----|----------|--------------------|------|-------|------------------------|----------------------|------|
| 128 | Cameroon | Bangabakundu       | 4.41 | 9.45  | NA                     | NA                   | [18] |
| 129 | Cameroon | Mt Oku             | 6.25 | 10.52 | NA                     | NA                   | [18] |
| 130 | Cameroon | Mt Oku             | 6.19 | 10.46 | NA                     | NA                   | [18] |
| 131 | Cameroon | Mt Oku             | 6.19 | 10.46 | NA                     | NA                   | [18] |
| 132 | Cameroon | Mt Cameroon        | 4.18 | 9.20  | NA                     | NA                   | [18] |
| 133 | Cameroon | Mt Oku             | 6.24 | 10.52 | NA                     | NA                   | [18] |
| 134 | Cameroon | Mt Oku             | 6.21 | 10.46 | NA                     | NA                   | [18] |
| 135 | Cameroon | Mundame            | 4.56 | 9.52  | NA                     | NA                   | [18] |
| 136 | Cameroon | Ndikinimeï         | 4.75 | 10.82 | NA                     | NA                   | [18] |
| 137 | Cameroon | Ndikinimeï         | 4.75 | 10.83 | NA                     | NA                   | [18] |
| 138 | Cameroon | Ndikinimeï         | 4.76 | 10.81 | NA                     | NA                   | [18] |
| 139 | Cameroon | Mt Oku             | 6.20 | 10.46 | NA                     | NA                   | [18] |
| 140 | Cameroon | Ntengue            | 5.37 | 10.02 | NA                     | NA                   | [18] |
| 141 | Cameroon | Manengouba village | 4.86 | 9.86  | <i>Cardioglossa</i>    | <i>melanogaster</i>  | [18] |
| 142 | Cameroon | Manengouba village | 4.96 | 9.87  | <i>Leptodactylodon</i> | <i>mertensi</i>      | [18] |
| 143 | Cameroon | Manengouba village | 4.96 | 9.87  | <i>Leptopelis</i>      | <i>calcaratus</i>    | [18] |
| 144 | Cameroon | Manengouba village | 4.95 | 9.88  | <i>Phrynobatrachus</i> | <i>africanus</i>     | [18] |
| 145 | Cameroon | Mt Manengouba      | 5.07 | 9.87  | <i>Cardioglossa</i>    | <i>gracilis</i>      | [18] |
| 146 | Cameroon | Mt Manengouba      | 5.07 | 9.87  | <i>Cardioglossa</i>    | <i>gracilis</i>      | [18] |
| 147 | Cameroon | Mt Manengouba      | 5.07 | 9.87  | <i>Cardioglossa</i>    | <i>gracilis</i>      | [18] |
| 148 | Cameroon | Mt Manengouba      | 5.07 | 9.87  | <i>Cardioglossa</i>    | <i>gracilis</i>      | [18] |
| 149 | Cameroon | Mt Manengouba      | 5.07 | 9.87  | <i>Cardioglossa</i>    | <i>melanogaster</i>  | [18] |
| 150 | Cameroon | Mt Manengouba      | 5.04 | 9.86  | <i>Arthroleptis</i>    | <i>perreti</i>       | [18] |
| 151 | Cameroon | Mt Manengouba      | 5.04 | 9.86  | <i>Leptodactylodon</i> | <i>erythrogaster</i> | [18] |
| 152 | Cameroon | Ebonemin           | 5.01 | 9.77  | <i>Leptopelis</i>      | <i>brevirostris</i>  | [18] |
| 153 | Cameroon | Ebonemin           | 5.01 | 9.77  | <i>Chlorolius</i>      | <i>koehleri</i>      | [18] |
| 154 | Cameroon | Ebonemin           | 5.01 | 9.78  | <i>Leptodactylodon</i> | <i>mertensi</i>      | [18] |
| 155 | Cameroon | Ebonemin           | 5.02 | 9.76  | <i>Leptopelis</i>      | <i>calcaratus</i>    | [18] |
| 156 | Cameroon | Nkack              | 5.04 | 9.77  | <i>Arthroleptis</i>    | <i>tuberosus</i>     | [18] |
| 157 | Cameroon | Nkack              | 5.04 | 9.77  | <i>Phrynobatrachus</i> | <i>cricogaster</i>   | [18] |
| 158 | Cameroon | Mt Manengouba      | 5.01 | 9.82  | <i>Leptodactylodon</i> | <i>erythrogaster</i> | [18] |
| 159 | Cameroon | Mt Manengouba      | 5.01 | 9.82  | <i>Leptopelis</i>      | <i>modestus</i>      | [18] |
| 160 | Cameroon | Mt Manengouba      | 5.01 | 9.82  | <i>Arthroleptis</i>    | <i>perreti</i>       | [18] |
| 161 | Cameroon | Mt Manengouba      | 5.01 | 9.82  | <i>Arthroleptis</i>    | <i>perreti</i>       | [18] |

|     |          |                    |        |       |                        |                            |      |
|-----|----------|--------------------|--------|-------|------------------------|----------------------------|------|
| 162 | Cameroon | Mt Manengouba      | 5.04   | 9.81  | <i>Arthroleptis</i>    | <i>perreti</i>             | [18] |
| 163 | Cameroon | Mt Manengouba      | 5.03   | 9.81  | <i>Leptodactylodon</i> | <i>erythrogaster</i>       | [18] |
| 164 | Cameroon | Ebo Forest Reserve | 4.35   | 10.23 | <i>Cardioglossa</i>    | <i>leucomystax</i>         | [18] |
| 165 | Ethiopia | Shawe bridge       | 6.65   | 39.73 | NA                     | NA                         | [19] |
| 166 | Ethiopia | Katcha             | 6.72   | 39.73 | NA                     | NA                         | [19] |
| 167 | Ethiopia | Rira               | 6.76   | 39.73 | NA                     | NA                         | [19] |
| 168 | Ethiopia | Fute               | 6.76   | 39.75 | NA                     | NA                         | [19] |
| 169 | Ethiopia | Tulla Negresso     | 6.78   | 39.75 | NA                     | NA                         | [19] |
| 170 | Ethiopia | Bonga town         | 7.27   | 36.26 | NA                     | NA                         | [19] |
| 171 | Ethiopia | Bonga stream       | 7.27   | 36.26 | NA                     | NA                         | [19] |
| 172 | Ethiopia | Bonga marsh        | 7.25   | 36.26 | NA                     | NA                         | [19] |
| 173 | Ethiopia | Mankira            | 7.20   | 36.29 | NA                     | NA                         | [19] |
| 174 | Ethiopia | Koma forest        | 7.32   | 36.08 | NA                     | NA                         | [19] |
| 175 | Ethiopia | Koma marsh         | 7.31   | 36.08 | NA                     | NA                         | [19] |
| 176 | Ethiopia | Wush wush          | 7.31   | 36.12 | NA                     | NA                         | [19] |
| 177 | Ethiopia | Saja forest        | 7.49   | 36.09 | NA                     | NA                         | [19] |
| 178 | Cameroon | Batouri District   | 4.43   | 14.34 | <i>Xenopus</i>         | <i>fraseri</i>             | [20] |
| 179 | Uganda   | Lake Bunyoni       | -1.23  | 29.82 | <i>Xenopus</i>         | <i>laevis bunyoniensis</i> | [20] |
| 180 | Malawi   | Lilongwe           | -13.98 | 33.78 | <i>Xenopus</i>         | <i>laevis laevis</i>       | [20] |

## References

1. Frost DR (2011) Amphibian Species of the World: an Online Reference. Version 5.5. <http://research.amnh.org/vz/herpetology/amphibia/> Accessed 28 February 2012.
2. Bell RC, Garcia AVG, Stuart BL, Zamudio KR (2011) High prevalence of the amphibian chytrid pathogen in Gabon. *EcoHealth* 8: 116-120.
3. Berger L, Parker JM (1999) In: Speare R, Berger L. (2000) Global distribution of chytridiomycosis in amphibians. Available: <http://www.jcu.edu.au/school/phtm/PHTM/frogs/chyglob.htm>. Accessed: 26 April 2011.
4. Conradie W, Harvey J, Kotze A, Dalton DL, Cunningham MJ (2011) Confirmed amphibian chytrid in Mount Mulanje Area, Malawi. *Herpetol Rev* 42: 369-371.
5. El Mouden EH, Slimani T, Donaire D, Fernández-Beaskoetxea S, Fisher MC, et al. (2011) First Record of the chytrid fungus *Batrachochytrium dendrobatidis* in North Africa. *Herpetol Rev* 42: 71-75.

6. Greenbaum E, Kusamba C, Aristote MM, Reed K (2008) Amphibian chytrid fungus infections in *Hyperolius* (Anura: Hyperoliidae) from eastern Democratic Republic of Congo. *Herpetol Rev* 39: 70-73.
7. Hopkins S, Channing A (2003) Chytrid fungus in northern and western Cape frog populations, South Africa. *Herpetol Rev* 34: 334-336.
8. Aanensen DM (2011) *Bd*-Maps. [www.bd-maps.net](http://www.bd-maps.net). Accessed 26 April 2011.
9. Imasuen AA, Aisen MSO, Weldon C, Dalton DL, Kotze A, et al. (2011) Occurrence of *Batrachochytrium dendrobatidis* in Amphibian Populations of Okomu National Park, Nigeria. *Herpetol Rev* 42: 379-382.
10. Kielgast J, Rödder D, Veith M, Lötters S (2010) Widespread occurrence of the amphibian chytrid fungus in Kenya. *Anim Conserv* 13: 1-8.
11. Lane E, Weldon C, Bingham J (2003) Histological evidence of chytridiomycosis in a free-ranging amphibian (*Afrana fuscigula* (Anura: Ranidae)) in South Africa. *J S Afr Vet Assoc* 74: 20-21.
12. Mendez D, Speare R, Cunningham AA (1999) In: Speare R, Berger L. (2000) Global distribution of chytridiomycosis in amphibians. Available: <http://www.jcu.edu.au/school/phtm/PHTM/frogs/chyglob.htm>. Accessed: 26 April 2011.
13. Reeder NMM, Cheng TL, Vredenburg VT, Blackburn DC (2011) Survey of the chytrid fungus *Batrachochytrium dendrobatidis* from montane and lowland frogs in eastern Nigeria. *Herpetol Notes* 4: 83-86.
14. Weldon C, de Villiers L, du Preez LH (2007) Quantification of the trade in *Xenopus laevis* from South Africa, with implications for biodiversity conservation. *Afr J Herpetol* 56: 77-83.
15. Weldon C (2005) Chytridiomycosis, an emerging infectious disease of amphibians in South Africa. PhD Thesis. Potchefstroom, North-West University. 213 p.
16. Weldon C, du Preez LH, Hyatt AD, Muller R, Speare R. (2004) Origin of the amphibian chytrid fungus. *Emerg Infect Diseases* 10: 2100-2105.
17. Baláž V, Kopecký O, Gvoždík V (2012) Presence of the amphibian chytrid pathogen confirmed in Cameroon. *Herp. J.* 22: 191-194.
18. Doherty-Bone TM, Gonwouo NL, Hirschfeld M, Ohst T, Weldon C et al. (in press) *Batrachochytrium dendrobatidis* in amphibians of Cameroon, including first records of infected caecilian hosts. *Dis Aquat Org.*
19. Gower DJ, Doherty-Bone TM, Aberra RK, Mengistu A, Schwaller S et al. 2012) High prevalence of the amphibian chytrid fungus (*Batrachochytrium dendrobatidis*) across multiple taxa and localities in the highlands of Ehtiopia. *Herp. J.* 22: 225-233.
20. Soto-Azat C, Clarke BT, Poynton JC, Cunningham AA (2010) Widespread historical presence of *Batrachochytrium dendrobatidis* in African pipid frogs. *Divers Distrib* 16: 126-131.
